# Supplementary material for: Bowel Histology of CVID Patients Reveals Distinct Patterns of Mucosal Inflammation
Source: Springer Nature journal article supplement (doi:10.1007/s10875-021-01104-5), 2021-10-01
Supplement: MOESM1 [file 19719924]

**Table S1: Descriptives of lymphocyte phenotyping**

|                                                                     | N  | Mean    | Std.-<br>Deviation | Minimum | Maximum |
|---------------------------------------------------------------------|----|---------|--------------------|---------|---------|
| CD4+ first (*10 <sup>9</sup> /l)                                    | 44 | 0.6755  | 0.31873            | 0.22    | 1.72    |
| CD4+ last (*10 <sup>9</sup> /l)                                     | 44 | 0.5807  | 0.36250            | 0.14    | 1.85    |
| CD8+ first (*10 <sup>9</sup> /l)                                    | 44 | 0.6185  | 0.76801            | 0.07    | 5.16    |
| CD8+ last (*10 <sup>9</sup> /l)                                     | 44 | 0.5852  | 0.97711            | 0.04    | 6.60    |
| NK first (*10 <sup>9</sup> /l)                                      | 44 | 0.1644  | 0.10428            | 0.04    | 0.47    |
| NK last (*10 <sup>9</sup> /l)                                       | 44 | 0.1478  | 0.11261            | 0.02    | 0.42    |
| CD19+ first (*10 <sup>9</sup> /l)                                   | 23 | 10.4509 | 8.44200            | 0.12    | 32.97   |
| CD19+ last (*10 <sup>9</sup> /l)                                    | 23 | 10.4943 | 8.36936            | 0.12    | 32.97   |
| % of CD19 naive first                                               | 22 | 80.3623 | 12.85620           | 44.54   | 94.24   |
| % of CD19 naive last                                                | 22 | 78.5068 | 11.56719           | 55.11   | 93.73   |
| % of CD19 IgM memory first                                          | 22 | 10.4359 | 8.89329            | 1.92    | 39.87   |
| % of CD19 IgM memorylast                                            | 22 | 11.5095 | 8.58444            | 3.34    | 39.87   |
| % of switched memory cells first                                    | 22 | 3.8150  | 4.64308            | 0.20    | 20.64   |
| % of switched memory cells last                                     | 22 | 3.9464  | 3.53630            | 0.20    | 13.47   |
| CD3+ first (*10 <sup>9</sup> /l)                                    | 10 | 70.8675 | 26.97412           | 0.68    | 95.00   |
| CD3+ last (*10 <sup>9</sup> /l)                                     | 10 | 70.0675 | 26.42371           | 0.68    | 95.00   |
| % of CD4+ CD45RO+ CXCR5+ (TFH) (memory) first                       | 11 | 18.000  | 10.5736            | 4.0     | 38.0    |
| % of CD4+ CD45RO+ CXCR5+ (TFH) (memory) last                        | 11 | 17.6364 | 10.79141           | 4.00    | 38.00   |
| % of CD4 naive first                                                | 11 | 14.3636 | 11.94381           | 1.00    | 43.00   |
| % of CD4 naive last                                                 | 11 | 14.4545 | 11.87740           | 1.00    | 43.00   |
| % of T-regulatory cells first                                       | 8  | 4.0000  | 2.00000            | 2.00    | 8.00    |
| % of T-regulatory cells last                                        | 8  | 4.0000  | 2.00000            | 2.00    | 8.00    |
| switched memory cells absolute first measured (*10 <sup>9</sup> /l) | 22 | 0.4234  | 0.59068            | 0.01    | 2.46    |
| switched memory cells absolute last measured (*10 <sup>9</sup> /l)  | 22 | 0.4076  | 0.43705            | 0.01    | 1.50    |
| CD4+ naive absolute first measured (*10 <sup>9</sup> /l)            | 11 | 0.0940  | 0.11945            | 0.01    | 0.44    |
| CD4+ naive absolute last measured (*10 <sup>9</sup> /l)             | 11 | 0.0853  | 0.09053            | 0.00    | 0.31    |

**Table S2: Results of Mann-Whitney-U-Test to analyse the association of lymphocyte phenotyping results with histological features.**

| Asymptotic Significance (2-sided) for                               | coeliac-like | NLH only | IBD-like colitis | any colitis | Raised IEL | Lack of PCs | normal mucosa | villous atrophy | inflammation |
|---------------------------------------------------------------------|--------------|----------|------------------|-------------|------------|-------------|---------------|-----------------|--------------|
| CD4+ first (*10 <sup>9</sup> /l)                                    | 0.883        | 0.920    | 0.667            | 0.559       | 0.703      | 0.584       | 0.228         | 0.078           | 0.271        |
| CD4+ last (*10 <sup>9</sup> /l)                                     | 0.285        | 0.496    | 0.763            | 0.515       | 0.603      | 0.245       | 0.560         | 0.808           | 0.544        |
| CD8+ first (*10 <sup>9</sup> /l)                                    | 0.472        | 0.302    | 0.731            | 0.345       | 0.323      | 0.732       | 0.860         | 0.832           | 0.748        |
| CD8+ last (*10 <sup>9</sup> /l)                                     | 0.210        | 0.313    | 0.931            | 0.686       | 0.253      | 0.891       | 0.989         | 0.585           | 0.647        |
| NK first (*10 <sup>9</sup> /l)                                      | 0.238        | 0.267    | 0.931            | 0.261       | 0.368      | 0.657       | 0.881         | 0.362           | 0.674        |
| NK last (*10 <sup>9</sup> /l)                                       | 0.113        | 0.496    | 0.796            | 0.486       | 0.253      | 0.356       | 0.989         | 0.281           | 0.720        |
| CD19+ first (*10 <sup>9</sup> /l)                                   | 0.361        | 0.268    | *                | 0.789       | 0.361      | 0.465       | 0.738         | 0.811           | 0.715        |
| CD19+ last (*10 <sup>9</sup> /l)                                    | 0.361        | 0.356    | *                | 0.285       | 0.361      | 0.465       | 0.640         | 0.811           | 0.927        |
| % of CD19 naive first                                               | 0.472        | 0.491    | *                | 0.885       | 0.472      | 0.886       | 0.647         | 0.688           | 0.819        |
| % of CD19 naive last                                                | 0.632        | 0.533    | *                | 0.664       | 0.632      | 0.534       | 0.647         | 0.841           | 0.424        |
| % of CD19 IgM memory first                                          | 0.231        | 0.309    | *                | 0.664       | 0.231      | 0.599       | 0.503         | 0.615           | 0.568        |
| % of CD19 IgM memory last                                           | 0.402        | 0.670    | *                | 0.885       | 0.402      | 0.738       | 0.597         | 0.920           | 0.424        |
| % of switched memory cells first                                    | 0.472        | 0.922    | *                | 0.885       | 0.472      | 0.811       | 0.972         | 1.000           | 0.648        |
| % of switched memory cells last                                     | 0.719        | 0.450    | *                | 0.664       | 0.719      | 0.599       | 0.647         | 0.688           | 0.424        |
| CD3+ first (*10 <sup>9</sup> /l)                                    | 0.192        | 0.909    | 0.513            | 0.248       | 0.192      | *           | 0.602         | 0.569           | 0.917        |
| CD3+ last (*10 <sup>9</sup> /l)                                     | 0.296        | 0.909    | 0.513            | 0.386       | 0.296      | *           | 0.602         | 0.732           | 0.754        |
| % of CD4+ CD45RO+ CXCR5+ (TFH) (memory) first                       | 0.096        | 0.461    | 0.313            | 0.858       | 0.096      | *           | 1.000         | 0.537           | 0.849        |
| % of CD4+ CD45RO+ CXCR5+ (TFH) (memory) last                        | 0.096        | 0.461    | 0.313            | 0.858       | 0.096      | *           | 1.000         | 0.537           | 0.849        |
| % of CD4 naive first                                                | 0.906        | 0.647    | 0.617            | 0.724       | 0.906      | *           | 1.000         | 0.759           | 0.925        |
| % of CD4 naive last                                                 | 0.814        | 0.584    | 0.617            | 0.724       | 0.814      | *           | 1.000         | 0.683           | 1.000        |
| % of T-regulatory cells first                                       | 0.120        | 0.304    | *                | 0.683       | 0.120      | *           | 0.657         | 0.120           | 0.734        |
| % of T-regulatory cells last                                        | 0.120        | 0.304    | *                | 0.683       | 0.120      | *           | 0.657         | 0.120           | 0.734        |
| switched memory cells absolute first measured (*10 <sup>9</sup> /l) | 0.632        | 0.974    | *                | 0.885       | 0.632      | 0.811       | 0.698         | 0.763           | 0.819        |
| switched memory cells absolute last measured (*10 <sup>9</sup> /l)  | 0.905        | 0.341    | *                | 0.885       | 0.905      | 0.599       | 0.418         | 0.615           | 0.909        |
| CD4+ naive absolute first measured (*10 <sup>9</sup> /l)            | 0.814        | 0.584    | 0.317            | 0.289       | 0.814      | *           | 0.343         | 0.307           | 0.257        |
| CD4+ naive absolute last measured (*10 <sup>9</sup> /l)             | 0.480        | 0.855    | 0.317            | 0.480       | 0.480      | *           | 0.206         | 0.838           | 0.131        |

\* Mann-Whitney-Test cannot be executed for empty groups.
